# Supplementary material for: Are dispersion corrections accurate outside equilibrium? A case study on benzene
Source: Beilstein J Org Chem. 2018 May 23;14:1181–91. doi: 10.3762/bjoc.14.99 (PMC6009208; doi:10.3762/bjoc.14.99)
Supplement: File 1 — All reference data. [file Beilstein_J_Org_Chem-14-1181-s001.csv]

# Data for:
# "Are dispersion corrections accurate outside equilibrium?
# A case study on benzene"
#
#
# Geometry is : Parallel
3.2	3.3	3.4	3.5	3.6	3.7	3.8	3.9	4.0	4.1	4.2	4.5	5.0	5.5	6.0	6.5
# Energies for B3LYP-D3-BJ method
-4010.2316	-4012.3545	-4013.7609	-4014.6615	-4015.1954	-4015.4786	-4015.5817	-4015.5662	-4015.4690	-4015.3232	-4015.1568	-4014.6207	-4013.8565	-4013.4022	-4013.2003	-4013.0981
# Energies for optB88vdW method
-3136.4899	-3138.5203	-3139.9051	-3140.8244	-3141.4092	-3141.7547	-3141.9242	-3141.9643	-3141.9136	-3141.8003	-3141.6485	-3141.0661	-3140.1137	-3139.4776	-3139.1323	-3138.9278
# Energies for SCAN method
-3748.2734	-3750.4137	-3751.9402	-3752.9389	-3753.6053	-3754.0080	-3754.2403	-3754.3628	-3754.3913	-3754.3880	-3754.3184	-3754.0222	-3753.5220	-3753.3283	-3753.2942	-3753.3171
# Energies for MBD method
-3510.3726	-3512.5095	-3513.9756	-3514.9672	-3515.6137	-3516.0211	-3516.2539	-3516.3587	-3516.3768	-3516.3319	-3516.2468	-3515.8378	-3515.1457	-3514.7657	-3514.5982	-3514.5262
# Energies for GTO_M06L method
-291525.8169	-291527.7558	-291529.1454	-291529.9601	-291530.4205	-291530.6985	-291530.7940	-291530.8720	-291530.7956	-291530.7170	-291530.7461	-291530.2897	-291529.5931	-291529.1423	-291529.0750	-291529.0971
# Energies for TS method
-3505.0336	-3507.2741	-3508.7353	-3509.6307	-3510.1222	-3510.3522	-3510.4118	-3510.3613	-3510.2465	-3510.0894	-3509.9122	-3509.3082	-3508.4422	-3507.9711	-3507.7504	-3507.6430
# Energies for Bench method
3.7120	1.6760	0.3010	-0.6150	-1.1850	-1.5130	-1.6620	-1.7010	-1.6650	-1.5810	-1.4590	-1.0810	-0.5750	-0.2740	-0.1140	-0.0360
# Energies for PBE method
-3494.9081	-3497.5286	-3499.4543	-3500.8784	-3501.9273	-3502.7049	-3503.2741	-3503.6834	-3503.9752	-3504.1724	-3504.3069	-3504.4172	-3504.2617	-3504.1754	-3504.1738	-3504.1939
# Energies for optPBEvdW method
-3097.3876	-3099.6983	-3101.3045	-3102.4023	-3103.1189	-3103.5609	-3103.7936	-3103.8691	-3103.8346	-3103.7176	-3103.5559	-3102.9015	-3101.7826	-3100.9949	-3100.5583	-3100.3009
# Energies for PBE-XDM method
4.7120	2.3736	0.7312	-0.4028	-1.1531	-1.6289	-1.8919	-1.9971	-2.0040	-1.9484	-1.8527	-1.4756	-0.8381	-0.4487	-0.2230	-0.1057
# Energies for LC-wPBE-XDM method
3.6482	1.5584	0.1299	-0.8195	-1.4145	-1.7643	-1.9264	-1.9562	-1.9104	-1.8102	-1.6689	-1.2148	-0.5994	-0.2439	-0.1275	-0.0263
# Energies for Dion method
-3039.9366	-3042.6480	-3044.5994	-3045.9933	-3046.9610	-3047.6145	-3048.0233	-3048.2446	-3048.3305	-3048.3123	-3048.2323	-3047.7492	-3046.7659	-3046.0156	-3045.5896	-3045.3312
# Energies for B3LYP method
-3976.7573	-3979.8018	-3982.0791	-3983.7927	-3985.0773	-3986.0466	-3986.7717	-3987.3159	-3987.7191	-3988.0188	-3988.2475	-3988.6409	-3988.8211	-3988.8743	-3988.9536	-3989.0132
# Energies for FI method
-3509.5688	-3511.7356	-3513.2335	-3514.2554	-3514.9328	-3515.3694	-3515.6297	-3515.7611	-3515.8034	-3515.7784	-3515.7145	-3515.3561	-3514.7170	-3514.3663	-3514.2159	-3514.1505
# Energies for B86BPBE-XDM method
4.2453	1.9711	0.4040	-0.6508	-1.3333	-1.7396	-1.9452	-2.0101	-1.9842	-1.9063	-1.7989	-1.3988	-0.8090	-0.4338	-0.2477	-0.1146
# Energies for D3-BJ method
-3514.9953	-3517.0955	-3518.5227	-3519.4733	-3520.0773	-3520.4412	-3520.6295	-3520.6907	-3520.6656	-3520.5758	-3520.4512	-3519.9325	-3519.1033	-3518.6342	-3518.4111	-3518.3003
# Energies for SCAN-rVV10 method
-3712.9001	-3714.9404	-3716.3691	-3717.2744	-3717.8503	-3718.1670	-3718.3169	-3718.3610	-3718.3158	-3718.2420	-3718.1071	-3717.6370	-3716.9134	-3716.5648	-3716.4260	-3716.3782
# Energies for D2 method
-3508.3055	-3510.0834	-3511.2508	-3512.0118	-3512.4883	-3512.7744	-3512.9220	-3512.9692	-3512.9493	-3512.8773	-3512.7789	-3512.3569	-3511.6719	-3511.2981	-3511.1325	-3511.0550
# Energies for D3 method
-3504.3127	-3506.6092	-3508.1854	-3509.2512	-3509.9479	-3510.3890	-3510.6413	-3510.7530	-3510.7646	-3510.6978	-3510.5845	-3510.0548	-3509.1757	-3508.6799	-3508.4465	-3508.3320
# Energies for vdWDF2 method
-3091.3606	-3093.9484	-3095.7773	-3097.0355	-3097.8738	-3098.3965	-3098.6835	-3098.7952	-3098.7812	-3098.6864	-3098.5396	-3097.9683	-3097.0008	-3096.3888	-3096.1184	-3095.9969
# Energies for B3LYP-XDM method
4.0954	1.8141	0.2885	-0.7111	-1.3279	-1.6684	-1.8132	-1.8197	-1.7412	-1.6273	-1.5029	-1.0901	-0.5418	-0.2705	-0.1683	-0.0741
#
#
# Geometry is : T
4.4	4.5	4.6	4.7	4.8	4.9	5.0	5.1	5.2	5.3	5.4	5.5	5.6	5.9	6.4	6.9	7.4	7.9
# Energies for B3LYP-D3-BJ method
-4012.7033	-4014.2335	-4015.2410	-4015.8609	-4016.2056	-4016.3571	-4016.3790	-4016.3068	-4016.1711	-4015.9453	-4015.6876	-4015.4243	-4015.1700	-4014.5160	-4013.8201	-4013.4514	-4013.2529	-4013.1327
# Energies for optB88vdW method
-3138.6222	-3140.0375	-3140.9837	-3141.5829	-3141.9367	-3142.1466	-3142.1294	-3142.0307	-3141.8815	-3141.6976	-3141.4981	-3141.2952	-3141.0974	-3140.5696	-3139.9130	-3139.4648	-3139.1888	-3139.0201
# Energies for SCAN method
-3751.7761	-3753.3205	-3754.3199	-3754.8652	-3755.4070	-3755.4738	-3755.7254	-3755.3835	-3755.4412	-3755.1541	-3755.0290	-3754.9074	-3754.6282	-3754.4360	-3754.0057	-3753.6891	-3753.5595	-3753.6279
# Energies for MBD method
-3513.6078	-3515.0757	-3516.0655	-3516.6983	-3517.0748	-3517.3085	-3517.2952	-3517.1995	-3517.0485	-3516.8657	-3516.6671	-3516.4676	-3516.2755	-3515.7704	-3515.1859	-3514.8434	-3514.6524	-3514.5435
# Energies for GTO_M06L method
-291527.8041	-291529.3675	-291530.3646	-291530.9711	-291531.2929	-291531.3779	-291531.3506	-291531.2509	-291531.1037	-291531.0090	-291530.8855	-291530.7820	-291530.6290	-291530.2917	-291529.8404	-291529.5335	-291529.3743	-291529.3049
# Energies for TS method
-3507.0225	-3508.5455	-3509.5584	-3510.1924	-3510.5689	-3510.8172	-3510.8462	-3510.8087	-3510.7096	-3510.5501	-3510.3403	-3510.1047	-3509.8657	-3509.2333	-3508.5371	-3508.1444	-3507.9262	-3507.8009
# Energies for Bench method
1.0980	-0.3980	-1.3980	-2.0310	-2.3960	-2.5700	-2.6100	-2.5600	-2.4530	-2.3110	-2.1500	-1.9830	-1.8170	-1.3640	-0.8260	-0.5090	-0.3250	-0.2150
# Energies for PBE method
-3500.1327	-3501.8534	-3503.0892	-3503.9599	-3504.5650	-3505.0340	-3505.2297	-3505.3320	-3505.3660	-3505.3554	-3505.3152	-3505.2600	-3505.1992	-3505.0116	-3504.7603	-3504.5989	-3504.5085	-3504.4579
# Energies for optPBEvdW method
-3099.3492	-3101.0004	-3102.1431	-3102.9025	-3103.3828	-3103.6897	-3103.7463	-3103.7019	-3103.5843	-3103.4179	-3103.2211	-3103.0110	-3102.7993	-3102.2034	-3101.4240	-3100.8814	-3100.5515	-3100.3538
# Energies for PBE-XDM method
1.5410	-0.0043	-1.0723	-1.7796	-2.2201	-2.4676	-2.5772	-2.5900	-2.5359	-2.4374	-2.3097	-2.1672	-2.0169	-1.5738	-0.9795	-0.5989	-0.3737	-0.2426
# Energies for LC-wPBE-XDM method
0.6714	-0.7414	-1.6803	-2.2676	-2.6014	-2.7564	-2.7883	-2.7356	-2.6284	-2.4886	-2.3292	-2.1613	-1.9925	-1.5188	-0.9281	-0.5741	-0.3669	-0.2512
# Energies for Dion method
-3042.1534	-3044.1321	-3045.5623	-3046.5724	-3047.2697	-3047.7518	-3047.9690	-3048.0619	-3048.0598	-3047.9901	-3047.8734	-3047.7293	-3047.5721	-3047.0889	-3046.3975	-3045.8823	-3045.5619	-3045.3669
# Energies for B3LYP method
-3982.9045	-3984.9359	-3986.4183	-3987.4853	-3988.2487	-3988.7903	-3989.1743	-3989.4367	-3989.6090	-3989.6666	-3989.6656	-3989.6365	-3989.5940	-3989.4548	-3989.3023	-3989.2293	-3989.1937	-3989.1663
# Energies for FI method
-3512.9861	-3514.4642	-3515.4637	-3516.1061	-3516.4919	-3516.7346	-3516.7319	-3516.6472	-3516.5083	-3516.3382	-3516.1529	-3515.9668	-3515.7880	-3515.3200	-3514.7797	-3514.4626	-3514.2983	-3514.1853
# Energies for B86BPBE-XDM method
1.6616	0.0984	-0.9761	-1.6852	-2.1265	-2.3754	-2.4840	-2.4943	-2.4379	-2.3386	-2.2124	-2.0712	-1.9235	-1.4933	-0.9381	-0.5894	-0.3752	-0.2495
# Energies for D3-BJ method
-3517.9104	-3519.3353	-3520.2885	-3520.8913	-3521.2437	-3521.4563	-3521.4289	-3521.3225	-3521.1632	-3520.9731	-3520.7679	-3520.5611	-3520.3613	-3519.8283	-3519.1922	-3518.8080	-3518.5885	-3518.4612
# Energies for SCAN-rVV10 method
-3715.8043	-3717.2810	-3718.2150	-3718.6979	-3719.1794	-3719.1078	-3719.3876	-3718.9944	-3719.0030	-3718.6695	-3718.5008	-3718.3380	-3718.0206	-3717.7276	-3717.1721	-3716.7709	-3716.5847	-3716.6157
# Energies for D2 method
-3511.1917	-3512.6966	-3513.6588	-3514.1820	-3514.3975	-3514.4787	-3514.3170	-3514.1036	-3513.8645	-3513.6197	-3513.3792	-3513.1525	-3512.9445	-3512.4266	-3511.8568	-3511.5279	-3511.3441	-3511.2394
# Energies for D3 method
-3507.3379	-3508.9203	-3510.0130	-3510.7339	-3511.1788	-3511.4567	-3511.4717	-3511.3925	-3511.2526	-3511.0784	-3510.8864	-3510.6893	-3510.4942	-3509.9465	-3509.2600	-3508.8506	-3508.6226	-3508.4924
# Energies for vdWDF2 method
-3093.4789	-3095.4325	-3096.8046	-3097.7351	-3098.3420	-3098.7333	-3098.8581	-3098.8541	-3098.7656	-3098.6138	-3098.4284	-3098.2274	-3098.0248	-3097.4970	-3096.8304	-3096.4392	-3096.2397	-3096.1376
# Energies for B3LYP-XDM method
1.5679	-0.0794	-1.1995	-1.9216	-2.3527	-2.5743	-2.6491	-2.6218	-2.5276	-2.3915	-2.2302	-2.0574	-1.8803	-1.3929	-0.8258	-0.5182	-0.3408	-0.2401
#
#
# Geometry is : Slide3.2
-2.0	-1.8	-1.6	-1.4	-1.2	-1.0	-0.8	-0.6	-0.4	-0.2	-0.0	0.2	0.4	0.6	0.8	1.0	1.2	1.4	1.6	1.8	-2.0	-1.8	-1.6	-1.4	-1.2	-1.0	-0.8	-0.6	-0.4	-0.2	0.0	0.2	0.4	0.6	0.8	1.0	1.2	1.4	1.6	1.8	2.0
# Energies for B3LYP-D3-BJ method
-4016.1186	-4016.1973	-4016.0665	-4015.7209	-4015.1265	-4014.2751	-4013.2264	-4012.1172	-4011.1328	-4010.4633	-4010.2315	-4010.4633	-4011.1328	-4012.1172	-4013.2264	-4014.2751	-4015.1265	-4015.7209	-4016.0665	-4016.1973	-4016.1186
# Energies for optB88vdW method
-3142.0087	-3142.1574	-3142.0576	-3141.7360	-3141.1650	-3140.3277	-3139.3037	-3138.2495	-3137.3334	-3136.7104	-3136.4899	-3136.7104	-3137.3334	-3138.2495	-3139.3037	-3140.3277	-3141.1650	-3141.7360	-3142.0576	-3142.1574	-3142.0087
# Energies for SCAN method
-3754.4768	-3754.5350	-3754.4122	-3754.0342	-3753.3651	-3752.4932	-3751.3858	-3750.2028	-3749.2337	-3748.5501	-3748.2734	-3748.5501	-3749.2337	-3750.2028	-3751.3858	-3752.4932	-3753.3651	-3754.0342	-3754.4122	-3754.5350	-3754.4768
# Energies for MBD method
-3516.3770	-3516.4442	-3516.2695	-3515.8789	-3515.2439	-3514.3492	-3513.2766	-3512.1841	-3511.2398	-3510.5993	-3510.3726	-3510.5993	-3511.2398	-3512.1841	-3513.2766	-3514.3492	-3515.2439	-3515.8789	-3516.2695	-3516.4442	-3516.3770
# Energies for GTO_M06L method
-291531.0093	-291531.0876	-291531.0477	-291530.8127	-291530.3306	-291529.5694	-291528.5913	-291527.5632	-291526.6672	-291526.0232	-291525.8169	-291526.0232	-291526.6672	-291527.5632	-291528.5913	-291529.5694	-291530.3306	-291530.8127	-291531.0477	-291531.0876	-291531.0093
# Energies for TS method
-3510.7947	-3510.9552	-3510.8640	-3510.5327	-3509.9260	-3509.0333	-3507.9496	-3506.8462	-3505.8979	-3505.2589	-3505.0336	-3505.2589	-3505.8979	-3506.8462	-3507.9496	-3509.0333	-3509.9260	-3510.5327	-3510.8640	-3510.9552	-3510.7947
# Energies for Bench method
-1.8200	-1.8250	-1.6980	-1.3740	-0.8150	-0.0330	0.9290	1.9430	2.8440	3.4880	3.7120	3.4880	2.8440	1.9430	0.9290	-0.0330	-0.8150	-1.3740	-1.6980	-1.8250	-1.8200	-1.8250	-1.6980	-1.3740	-0.8150	-0.0330	0.9290	1.9430	2.8440	3.4880	3.7120	3.4880	2.8440	1.9430	0.9290	-0.0330	-0.8150	-1.3740	-1.6980	-1.8250	-1.8200
# Energies for PBE method
-3502.1044	-3501.9608	-3501.5887	-3501.0193	-3500.2276	-3499.1943	-3498.0081	-3496.8287	-3495.8219	-3495.1454	-3494.9081	-3495.1454	-3495.8219	-3496.8287	-3498.0081	-3499.1943	-3500.2276	-3501.0193	-3501.5887	-3501.9608	-3502.1044
# Energies for optPBEvdW method
-3103.3189	-3103.3970	-3103.2273	-3102.8385	-3102.2065	-3101.3184	-3100.2566	-3099.1767	-3098.2441	-3097.6118	-3097.3876	-3097.6118	-3098.2441	-3099.1767	-3100.2566	-3101.3184	-3102.2065	-3102.8385	-3103.2273	-3103.3970	-3103.3189
# Energies for PBE-XDM method
-1.3819	-1.2964	-1.0731	-0.6634	-0.0324	0.8274	1.8484	2.8994	3.8374	4.4886	4.7120	4.4886	3.8374	2.8994	1.8484	0.8274	-0.0324	-0.6634	-1.0731	-1.2964	-1.3819
# Energies for LC-wPBE-XDM method
-2.0524	-2.0754	-1.9551	-1.6321	-1.0655	-0.2500	0.7488	1.8034	2.7511	3.4149	3.6482	3.4149	2.7511	1.8034	0.7488	-0.2500	-1.0655	-1.6321	-1.9551	-2.0754	-2.0524
# Energies for Dion method
-3046.5737	-3046.5220	-3046.2304	-3045.7278	-3044.9955	-3044.0251	-3042.9009	-3041.7765	-3040.8147	-3040.1661	-3039.9366	-3040.1661	-3040.8147	-3041.7765	-3042.9009	-3044.0251	-3044.9955	-3045.7278	-3046.2304	-3046.5220	-3046.5737
# Energies for B3LYP method
-3985.0436	-3984.7087	-3984.1895	-3983.4873	-3982.5740	-3981.4464	-3980.1678	-3978.8777	-3977.7632	-3977.0151	-3976.7573	-3977.0151	-3977.7632	-3978.8777	-3980.1678	-3981.4464	-3982.5740	-3983.4873	-3984.1895	-3984.7087	-3985.0436
# Energies for FI method
-3515.6344	-3515.6899	-3515.5047	-3515.1046	-3514.4618	-3513.5601	-3512.4824	-3511.3857	-3510.4386	-3509.7962	-3509.5688	-3509.7962	-3510.4386	-3511.3857	-3512.4824	-3513.5601	-3514.4618	-3515.1046	-3515.5047	-3515.6899	-3515.6344
# Energies for B86BPBE-XDM method
-1.6365	-1.5867	-1.3989	-1.0225	-0.4248	0.4049	1.4040	2.4371	3.3706	4.0123	4.2453	4.0123	3.3706	2.4371	1.4040	0.4049	-0.4248	-1.0225	-1.3989	-1.5867	-1.6365
# Energies for D3-BJ method
-3520.7471	-3520.8523	-3520.7145	-3520.3586	-3519.7565	-3518.8918	-3517.8464	-3516.7764	-3515.8489	-3515.2188	-3514.9953	-3515.2188	-3515.8489	-3516.7764	-3517.8464	-3518.8918	-3519.7565	-3520.3586	-3520.7145	-3520.8523	-3520.7471
# Energies for SCAN-rVV10 method
-3718.7874	-3718.9037	-3718.8346	-3718.5052	-3717.8786	-3717.0425	-3715.9638	-3714.8027	-3713.8485	-3713.1737	-3712.9001	-3713.1737	-3713.8485	-3714.8027	-3715.9638	-3717.0425	-3717.8786	-3718.5052	-3718.8346	-3718.9037	-3718.7874
# Energies for D2 method
-3513.6810	-3513.8403	-3513.7571	-3513.4579	-3512.9127	-3512.0960	-3511.0906	-3510.0516	-3509.1431	-3508.5240	-3508.3055	-3508.5240	-3509.1431	-3510.0516	-3511.0906	-3512.0960	-3512.9127	-3513.4579	-3513.7571	-3513.8403	-3513.6810
# Energies for D3 method
-3510.4217	-3510.4681	-3510.2765	-3509.8714	-3509.2234	-3508.3159	-3507.2322	-3506.1315	-3505.1824	-3504.5400	-3504.3127	-3504.5400	-3505.1824	-3506.1315	-3507.2322	-3508.3159	-3509.2234	-3509.8714	-3510.2765	-3510.4681	-3510.4217
# Energies for vdWDF2 method
-3097.8169	-3097.8143	-3097.5609	-3097.0921	-3096.3853	-3095.4324	-3094.3175	-3093.1966	-3092.2360	-3091.5882	-3091.3606	-3091.5882	-3092.2360	-3093.1966	-3094.3175	-3095.4324	-3096.3853	-3097.0921	-3097.5609	-3097.8143	-3097.8169
# Energies for B3LYP-XDM method
-1.9258	-1.9050	-1.7310	-1.3530	-0.7383	0.1252	1.1599	2.2313	3.1940	3.8637	4.0954	3.8637	3.1940	2.2313	1.1599	0.1252	-0.7383	-1.3530	-1.7310	-1.9050	-1.9258
#
#
# Geometry is : Slide3.4
-2.0	-1.8	-1.6	-1.4	-1.2	-1.0	-0.8	-0.6	-0.4	-0.2	-0.0	0.2	0.4	0.6	0.8	1.0	1.2	1.4	1.6	1.8	-2.0	-1.8	-1.6	-1.4	-1.2	-1.0	-0.8	-0.6	-0.4	-0.2	0.0	0.2	0.4	0.6	0.8	1.0	1.2	1.4	1.6	1.8	2.0
# Energies for B3LYP-D3-BJ method
-4016.7472	-4016.8872	-4016.8749	-4016.7094	-4016.3917	-4015.9304	-4015.3617	-4014.7624	-4014.2357	-4013.8823	-4013.7602	-4013.8823	-4014.2357	-4014.7624	-4015.3617	-4015.9304	-4016.3917	-4016.7094	-4016.8749	-4016.8872	-4016.7472
# Energies for optB88vdW method
-3142.6703	-3142.8427	-3142.8690	-3142.7045	-3142.3798	-3141.9221	-3141.3809	-3140.8278	-3140.3473	-3140.0206	-3139.9051	-3140.0206	-3140.3473	-3140.8278	-3141.3809	-3141.9221	-3142.3798	-3142.7045	-3142.8690	-3142.8427	-3142.6703
# Energies for SCAN method
-3755.2616	-3755.3591	-3755.3523	-3755.1446	-3754.7393	-3754.2467	-3753.6309	-3752.9733	-3752.4678	-3752.1027	-3751.9402	-3752.1027	-3752.4678	-3752.9733	-3753.6309	-3754.2467	-3754.7393	-3755.1446	-3755.3523	-3755.3591	-3755.2616
# Energies for MBD method
-3517.1261	-3517.2281	-3517.1934	-3516.9726	-3516.5976	-3516.0961	-3515.5182	-3514.9368	-3514.4356	-3514.0960	-3513.9756	-3514.0960	-3514.4356	-3514.9368	-3515.5182	-3516.0961	-3516.5976	-3516.9726	-3517.1934	-3517.2281	-3517.1261
# Energies for GTO_M06L method
-291531.6771	-291531.7543	-291531.7600	-291531.6659	-291531.4435	-291531.0605	-291530.5809	-291530.0712	-291529.6115	-291529.2899	-291529.1454	-291529.2899	-291529.6115	-291530.0712	-291530.5809	-291531.0605	-291531.4435	-291531.6659	-291531.7600	-291531.7543	-291531.6771
# Energies for TS method
-3511.4819	-3511.6797	-3511.7354	-3511.5933	-3511.2790	-3510.8176	-3510.2616	-3509.6901	-3509.1929	-3508.8551	-3508.7353	-3508.8551	-3509.1929	-3509.6901	-3510.2616	-3510.8176	-3511.2790	-3511.5933	-3511.7354	-3511.6797	-3511.4819
# Energies for Bench method
-2.5220	-2.5770	-2.5430	-2.3920	-2.1030	-1.6840	-1.1700	-0.6340	-0.1660	0.1730	0.3010	0.1730	-0.1660	-0.6340	-1.1700	-1.6840	-2.1030	-2.3920	-2.5430	-2.5770	-2.5220	-2.5770	-2.5430	-2.3920	-2.1030	-1.6840	-1.1700	-0.6340	-0.1660	0.1730	0.3010	0.1730	-0.1660	-0.6340	-1.1700	-1.6840	-2.1030	-2.3920	-2.5430	-2.5770	-2.5220
# Energies for PBE method
-3503.6051	-3503.5322	-3503.3322	-3502.9617	-3502.4564	-3501.8394	-3501.1666	-3500.5114	-3499.9548	-3499.5834	-3499.4543	-3499.5834	-3499.9548	-3500.5114	-3501.1666	-3501.8394	-3502.4564	-3502.9617	-3503.3322	-3503.5322	-3503.6051
# Energies for optPBEvdW method
-3104.2960	-3104.4363	-3104.4276	-3104.2288	-3103.8718	-3103.3851	-3102.8205	-3102.2500	-3101.7573	-3101.4233	-3101.3045	-3101.4233	-3101.7573	-3102.2500	-3102.8205	-3103.3851	-3103.8718	-3104.2288	-3104.4276	-3104.4363	-3104.2960
# Energies for PBE-XDM method
-2.4358	-2.4369	-2.3479	-2.1401	-1.8000	-1.3440	-0.8014	-0.2412	0.2548	0.6009	0.7312	0.6009	0.2548	-0.2412	-0.8014	-1.3440	-1.8000	-2.1401	-2.3479	-2.4369	-2.4358
# Energies for LC-wPBE-XDM method
-2.7936	-2.8621	-2.8375	-2.6869	-2.3888	-1.9548	-1.4212	-0.8582	-0.3544	-0.0023	0.1299	-0.0023	-0.3544	-0.8582	-1.4212	-1.9548	-2.3888	-2.6869	-2.8375	-2.8621	-2.7936
# Energies for Dion method
-3048.0925	-3048.1418	-3048.0509	-3047.7746	-3047.3482	-3046.8032	-3046.1920	-3045.5869	-3045.0705	-3044.7227	-3044.5994	-3044.7227	-3045.0705	-3045.5869	-3046.1920	-3046.8032	-3047.3482	-3047.7746	-3048.0509	-3048.1418	-3048.0925
# Energies for B3LYP method
-3987.0249	-3986.8307	-3986.5037	-3986.0483	-3985.4704	-3984.7826	-3984.0246	-3983.2757	-3982.6410	-3982.2223	-3982.0783	-3982.2223	-3982.6410	-3983.2757	-3984.0246	-3984.7826	-3985.4704	-3986.0483	-3986.5037	-3986.8307	-3987.0249
# Energies for FI method
-3516.4386	-3516.5296	-3516.4851	-3516.2558	-3515.8739	-3515.3663	-3514.7841	-3514.1988	-3513.6952	-3513.3542	-3513.2335	-3513.3542	-3513.6952	-3514.1988	-3514.7841	-3515.3663	-3515.8739	-3516.2558	-3516.4851	-3516.5296	-3516.4386
# Energies for B86BPBE-XDM method
-2.5695	-2.5990	-2.5406	-2.3637	-2.0524	-1.6141	-1.0917	-0.5479	-0.0583	0.2819	0.4040	0.2819	-0.0583	-0.5479	-1.0917	-1.6141	-2.0524	-2.3637	-2.5406	-2.5990	-2.5695
# Energies for D3-BJ method
-3521.4589	-3521.5932	-3521.5913	-3521.4009	-3521.0540	-3520.5779	-3520.0224	-3519.4590	-3518.9714	-3518.6402	-3518.5227	-3518.6402	-3518.9714	-3519.4590	-3520.0224	-3520.5779	-3521.0540	-3521.4009	-3521.5913	-3521.5932	-3521.4589
# Energies for SCAN-rVV10 method
-3719.4110	-3719.5597	-3719.5994	-3719.4344	-3719.0666	-3718.6056	-3718.0153	-3717.3775	-3716.8857	-3716.5287	-3716.3691	-3716.5287	-3716.8857	-3717.3775	-3718.0153	-3718.6056	-3719.0666	-3719.4344	-3719.5994	-3719.5597	-3719.4110
# Energies for D2 method
-3514.0326	-3514.1812	-3514.1925	-3514.0201	-3513.6966	-3513.2412	-3512.7064	-3512.1620	-3511.6861	-3511.3635	-3511.2508	-3511.3635	-3511.6861	-3512.1620	-3512.7064	-3513.2412	-3513.6966	-3514.0201	-3514.1925	-3514.1812	-3514.0326
# Energies for D3 method
-3511.3440	-3511.4367	-3511.3952	-3511.1698	-3510.7935	-3510.2933	-3509.7186	-3509.1404	-3508.6423	-3508.3050	-3508.1854	-3508.3050	-3508.6423	-3509.1404	-3509.7186	-3510.2933	-3510.7935	-3511.1698	-3511.3952	-3511.4367	-3511.3440
# Energies for vdWDF2 method
-3099.0761	-3099.1853	-3099.1284	-3098.8869	-3098.4893	-3097.9647	-3097.3651	-3096.7638	-3096.2477	-3095.8994	-3095.7773	-3095.8994	-3096.2477	-3096.7638	-3097.3651	-3097.9647	-3098.4893	-3098.8869	-3099.1284	-3099.1853	-3099.0761
# Energies for B3LYP-XDM method
-2.7468	-2.8018	-2.7556	-2.5776	-2.2584	-1.8116	-1.2691	-0.7040	-0.1989	0.1558	0.2885	0.1558	-0.1989	-0.7040	-1.2691	-1.8116	-2.2584	-2.5776	-2.7556	-2.8018	-2.7468
#
#
# Geometry is : Slide3.6
-2.0	-1.8	-1.6	-1.4	-1.2	-1.0	-0.8	-0.6	-0.4	-0.2	-0.0	0.2	0.4	0.6	0.8	1.0	1.2	1.4	1.6	1.8	-2.0	-1.8	-1.6	-1.4	-1.2	-1.0	-0.8	-0.6	-0.4	-0.2	0.0	0.2	0.4	0.6	0.8	1.0	1.2	1.4	1.6	1.8	2.0
# Energies for B3LYP-D3-BJ method
-4016.6203	-4016.7698	-4016.8192	-4016.7572	-4016.5917	-4016.3405	-4016.0332	-4015.7140	-4015.4402	-4015.2601	-4015.1977	-4015.2601	-4015.4402	-4015.7140	-4016.0332	-4016.3405	-4016.5917	-4016.7572	-4016.8192	-4016.7698	-4016.6203
# Energies for optB88vdW method
-3142.6265	-3142.7636	-3142.8635	-3142.8338	-3142.6781	-3142.4421	-3142.1627	-3141.8793	-3141.6344	-3141.4682	-3141.4092	-3141.4682	-3141.6344	-3141.8793	-3142.1627	-3142.4421	-3142.6781	-3142.8338	-3142.8635	-3142.7636	-3142.6265
# Energies for SCAN method
-3755.3155	-3755.3903	-3755.4562	-3755.3598	-3755.1180	-3754.8559	-3754.5204	-3754.1533	-3753.8988	-3753.7053	-3753.6053	-3753.7053	-3753.8988	-3754.1533	-3754.5204	-3754.8559	-3755.1180	-3755.3598	-3755.4562	-3755.3903	-3755.3155
# Energies for MBD method
-3517.1555	-3517.2316	-3517.2768	-3517.2000	-3517.0024	-3516.7304	-3516.4212	-3516.1151	-3515.8533	-3515.6767	-3515.6137	-3515.6767	-3515.8533	-3516.1151	-3516.4212	-3516.7304	-3517.0024	-3517.2000	-3517.2768	-3517.2316	-3517.1555
# Energies for GTO_M06L method
-291531.6697	-291531.7197	-291531.7195	-291531.6850	-291531.5567	-291531.3600	-291531.1219	-291530.8646	-291530.6298	-291530.4724	-291530.4205	-291530.4724	-291530.6298	-291530.8646	-291531.1219	-291531.3600	-291531.5567	-291531.6850	-291531.7195	-291531.7197	-291531.6697
# Energies for TS method
-3511.2629	-3511.4132	-3511.5286	-3511.5160	-3511.3745	-3511.1491	-3510.8759	-3510.5954	-3510.3500	-3510.1824	-3510.1222	-3510.1824	-3510.3500	-3510.5954	-3510.8759	-3511.1491	-3511.3745	-3511.5160	-3511.5286	-3511.4132	-3511.2629
# Energies for Bench method
-2.5530	-2.6110	-2.6230	-2.5600	-2.4200	-2.2040	-1.9370	-1.6500	-1.4050	-1.2380	-1.1850	-1.2380	-1.4050	-1.6500	-1.9370	-2.2040	-2.4200	-2.5600	-2.6230	-2.6110	-2.5530	-2.6110	-2.6230	-2.5600	-2.4200	-2.2040	-1.9370	-1.6500	-1.4050	-1.2380	-1.1850	-1.2380	-1.4050	-1.6500	-1.9370	-2.2040	-2.4200	-2.5600	-2.6230	-2.6110	-2.5530
# Energies for PBE method
-3504.2833	-3504.2198	-3504.1307	-3503.9322	-3503.6287	-3503.2615	-3502.8755	-3502.5101	-3502.2017	-3501.9973	-3501.9273	-3501.9973	-3502.2017	-3502.5101	-3502.8755	-3503.2615	-3503.6287	-3503.9322	-3504.1307	-3504.2198	-3504.2833
# Energies for optPBEvdW method
-3104.4252	-3104.5575	-3104.6471	-3104.6046	-3104.4363	-3104.1873	-3103.8961	-3103.6033	-3103.3512	-3103.1801	-3103.1189	-3103.1801	-3103.3512	-3103.6033	-3103.8961	-3104.1873	-3104.4363	-3104.6046	-3104.6471	-3104.5575	-3104.4252
# Energies for PBE-XDM method
-2.6974	-2.7393	-2.7236	-2.6378	-2.4739	-2.2369	-1.9494	-1.6554	-1.3948	-1.2180	-1.1531	-1.2180	-1.3948	-1.6554	-1.9494	-2.2369	-2.4739	-2.6378	-2.7236	-2.7393	-2.6974
# Energies for LC-wPBE-XDM method
-2.8299	-2.9108	-2.9319	-2.8752	-2.7328	-2.5087	-2.2268	-1.9285	-1.6627	-1.4802	-1.4145	-1.4802	-1.6627	-1.9285	-2.2268	-2.5087	-2.7328	-2.8752	-2.9319	-2.9108	-2.8299
# Energies for Dion method
-3048.6128	-3048.6850	-3048.7179	-3048.6247	-3048.4105	-3048.1214	-3047.7968	-3047.4782	-3047.2078	-3047.0259	-3046.9610	-3047.0259	-3047.2078	-3047.4782	-3047.7968	-3048.1214	-3048.4105	-3048.6247	-3048.7179	-3048.6850	-3048.6128
# Energies for B3LYP method
-3988.0638	-3987.9488	-3987.7491	-3987.4569	-3987.0843	-3986.6522	-3986.1930	-3985.7535	-3985.3924	-3985.1594	-3985.0795	-3985.1594	-3985.3924	-3985.7535	-3986.1930	-3986.6522	-3987.0843	-3987.4569	-3987.7491	-3987.9488	-3988.0638
# Energies for FI method
-3516.5223	-3516.5890	-3516.6260	-3516.5415	-3516.3379	-3516.0605	-3515.7474	-3515.4378	-3515.1741	-3514.9960	-3514.9328	-3514.9960	-3515.1741	-3515.4378	-3515.7474	-3516.0605	-3516.3379	-3516.5415	-3516.6260	-3516.5890	-3516.5223
# Energies for B86BPBE-XDM method
-2.7323	-2.7931	-2.8007	-2.7336	-2.5848	-2.3652	-2.0964	-1.8143	-1.5636	-1.3925	-1.3333	-1.3925	-1.5636	-1.8143	-2.0964	-2.3652	-2.5848	-2.7336	-2.8007	-2.7931	-2.7323
# Energies for D3-BJ method
-3521.4376	-3521.5420	-3521.6151	-3521.5649	-3521.3917	-3521.1410	-3520.8502	-3520.5587	-3520.3081	-3520.1380	-3520.0773	-3520.1380	-3520.3081	-3520.5587	-3520.8502	-3521.1410	-3521.3917	-3521.5649	-3521.6151	-3521.5420	-3521.4376
# Energies for SCAN-rVV10 method
-3719.3159	-3719.4358	-3719.5422	-3719.4823	-3719.2729	-3719.0384	-3718.7255	-3718.3760	-3718.1337	-3717.9477	-3717.8503	-3717.9477	-3718.1337	-3718.3760	-3718.7255	-3719.0384	-3719.2729	-3719.4823	-3719.5422	-3719.4358	-3719.3159
# Energies for D2 method
-3513.8404	-3513.9398	-3514.0058	-3513.9524	-3513.7815	-3513.5323	-3513.2471	-3512.9629	-3512.7140	-3512.5460	-3512.4883	-3512.5460	-3512.7140	-3512.9629	-3513.2471	-3513.5323	-3513.7815	-3513.9524	-3514.0058	-3513.9398	-3513.8404
# Energies for D3 method
-3511.4502	-3511.5299	-3511.5781	-3511.5047	-3511.3115	-3511.0447	-3510.7416	-3510.4409	-3510.1839	-3510.0099	-3509.9479	-3510.0099	-3510.1839	-3510.4409	-3510.7416	-3511.0447	-3511.3115	-3511.5047	-3511.5781	-3511.5299	-3511.4502
# Energies for vdWDF2 method
-3099.3508	-3099.4747	-3099.5440	-3099.4730	-3099.2801	-3099.0092	-3098.6970	-3098.3848	-3098.1176	-3097.9372	-3097.8738	-3097.9372	-3098.1176	-3098.3848	-3098.6970	-3099.0092	-3099.2801	-3099.4730	-3099.5440	-3099.4747	-3099.3508
# Energies for B3LYP-XDM method
-2.7530	-2.8262	-2.8398	-2.7789	-2.6321	-2.4044	-2.1210	-1.8281	-1.5690	-1.3916	-1.3279	-1.3916	-1.5690	-1.8281	-2.1210	-2.4044	-2.6321	-2.7789	-2.8398	-2.8262	-2.7530
#
#
# Geometry is : Slide3.8
-2.0	-1.8	-1.6	-1.4	-1.2	-1.0	-0.8	-0.6	-0.4	-0.2	-0.0	0.2	0.4	0.6	0.8	1.0	1.2	1.4	1.6	1.8	-2.0	-1.8	-1.6	-1.4	-1.2	-1.0	-0.8	-0.6	-0.4	-0.2	0.0	0.2	0.4	0.6	0.8	1.0	1.2	1.4	1.6	1.8	2.0
# Energies for B3LYP-D3-BJ method
-4016.1713	-4016.3020	-4016.3719	-4016.3702	-4016.2974	-4016.1687	-4016.0074	-4015.8430	-4015.7041	-4015.6130	-4015.5810	-4015.6130	-4015.7041	-4015.8430	-4016.0074	-4016.1687	-4016.2974	-4016.3702	-4016.3719	-4016.3020	-4016.1713
# Energies for optB88vdW method
-3142.2650	-3142.3798	-3142.4927	-3142.5517	-3142.5216	-3142.4244	-3142.2921	-3142.1542	-3142.0347	-3141.9533	-3141.9242	-3141.9533	-3142.0347	-3142.1542	-3142.2921	-3142.4244	-3142.5216	-3142.5517	-3142.4927	-3142.3798	-3142.2650
# Energies for SCAN method
-3755.0446	-3755.0863	-3755.1732	-3755.1661	-3755.0445	-3754.9230	-3754.7435	-3754.5329	-3754.4099	-3754.3070	-3754.2403	-3754.3070	-3754.4099	-3754.5329	-3754.7435	-3754.9230	-3755.0445	-3755.1661	-3755.1732	-3755.0863	-3755.0446
# Energies for MBD method
-3516.8766	-3516.9405	-3517.0066	-3517.0238	-3516.9573	-3516.8283	-3516.6699	-3516.5115	-3516.3771	-3516.2861	-3516.2539	-3516.2861	-3516.3771	-3516.5115	-3516.6699	-3516.8283	-3516.9573	-3517.0238	-3517.0066	-3516.9405	-3516.8766
# Energies for GTO_M06L method
-291531.4333	-291531.4909	-291531.5118	-291531.4482	-291531.3564	-291531.2583	-291531.1481	-291531.0207	-291530.8960	-291530.8173	-291530.7940	-291530.8173	-291530.8960	-291531.0207	-291531.1481	-291531.2583	-291531.3564	-291531.4482	-291531.5118	-291531.4909	-291531.4333
# Energies for TS method
-3510.7249	-3510.8406	-3510.9560	-3511.0191	-3510.9941	-3510.9015	-3510.7736	-3510.6391	-3510.5216	-3510.4407	-3510.4118	-3510.4407	-3510.5216	-3510.6391	-3510.7736	-3510.9015	-3510.9941	-3511.0191	-3510.9560	-3510.8406	-3510.7249
# Energies for Bench method
-2.2840	-2.3470	-2.3750	-2.3480	-2.2810	-2.1750	-2.0390	-1.8930	-1.7590	-1.6800	-1.6620	-1.6800	-1.7590	-1.8930	-2.0390	-2.1750	-2.2810	-2.3480	-2.3750	-2.3470	-2.2840	-2.3470	-2.3750	-2.3480	-2.2810	-2.1750	-2.0390	-1.8930	-1.7590	-1.6800	-1.6620	-1.6800	-1.7590	-1.8930	-2.0390	-2.1750	-2.2810	-2.3480	-2.3750	-2.3470	-2.2840
# Energies for PBE method
-3504.5445	-3504.4991	-3504.4586	-3504.3798	-3504.2293	-3504.0234	-3503.8025	-3503.5962	-3503.4235	-3503.3113	-3503.2741	-3503.3113	-3503.4235	-3503.5962	-3503.8025	-3504.0234	-3504.2293	-3504.3798	-3504.4586	-3504.4991	-3504.5445
# Energies for optPBEvdW method
-3104.1338	-3104.2584	-3104.3766	-3104.4363	-3104.4049	-3104.3050	-3104.1698	-3104.0292	-3103.9073	-3103.8239	-3103.7936	-3103.8239	-3103.9073	-3104.0292	-3104.1698	-3104.3050	-3104.4049	-3104.4363	-3104.3766	-3104.2584	-3104.1338
# Energies for PBE-XDM method
-2.5710	-2.6224	-2.6380	-2.6128	-2.5417	-2.4292	-2.2856	-2.1401	-2.0107	-1.9222	-1.8919	-1.9222	-2.0107	-2.1401	-2.2856	-2.4292	-2.5417	-2.6128	-2.6380	-2.6224	-2.5710
# Energies for LC-wPBE-XDM method
-2.5527	-2.6251	-2.6606	-2.6500	-2.5878	-2.4791	-2.3361	-2.1849	-2.0506	-1.9583	-1.9264	-1.9583	-2.0506	-2.1849	-2.3361	-2.4791	-2.5878	-2.6500	-2.6606	-2.6251	-2.5527
# Energies for Dion method
-3048.5960	-3048.6818	-3048.7625	-3048.7877	-3048.7259	-3048.5992	-3048.4412	-3048.2825	-3048.1476	-3048.0563	-3048.0233	-3048.0563	-3048.1476	-3048.2825	-3048.4412	-3048.5992	-3048.7259	-3048.7877	-3048.7625	-3048.6818	-3048.5960
# Energies for B3LYP method
-3988.5828	-3988.5076	-3988.3833	-3988.2021	-3987.9675	-3987.6970	-3987.4165	-3987.1574	-3986.9497	-3986.8170	-3986.7709	-3986.8170	-3986.9497	-3987.1574	-3987.4165	-3987.6970	-3987.9675	-3988.2021	-3988.3833	-3988.5076	-3988.5828
# Energies for FI method
-3516.2930	-3516.3492	-3516.4084	-3516.4194	-3516.3476	-3516.2141	-3516.0523	-3515.8911	-3515.7548	-3515.6627	-3515.6297	-3515.6627	-3515.7548	-3515.8911	-3516.0523	-3516.2141	-3516.3476	-3516.4194	-3516.4084	-3516.3492	-3516.2930
# Energies for B86BPBE-XDM method
-2.5380	-2.6044	-2.6329	-2.6166	-2.5560	-2.4548	-2.3249	-2.1885	-2.0627	-1.9742	-1.9452	-1.9742	-2.0627	-2.1885	-2.3249	-2.4548	-2.5560	-2.6166	-2.6329	-2.6044	-2.5380
# Energies for D3-BJ method
-3521.0995	-3521.1881	-3521.2777	-3521.3176	-3521.2718	-3521.1609	-3521.0177	-3520.8716	-3520.7460	-3520.6605	-3520.6295	-3520.6605	-3520.7460	-3520.8716	-3521.0177	-3521.1609	-3521.2718	-3521.3176	-3521.2777	-3521.1881	-3521.0995
# Energies for SCAN-rVV10 method
-3718.9092	-3718.9895	-3719.1118	-3719.1361	-3719.0423	-3718.9446	-3718.7849	-3718.5898	-3718.4777	-3718.3813	-3718.3169	-3718.3813	-3718.4777	-3718.5898	-3718.7849	-3718.9446	-3719.0423	-3719.1361	-3719.1118	-3718.9895	-3718.9092
# Energies for D2 method
-3513.4546	-3513.5300	-3513.6043	-3513.6324	-3513.5795	-3513.4600	-3513.3126	-3513.1654	-3513.0360	-3512.9503	-3512.9220	-3512.9503	-3513.0360	-3513.1654	-3513.3126	-3513.4600	-3513.5795	-3513.6324	-3513.6043	-3513.5300	-3513.4546
# Energies for D3 method
-3511.1869	-3511.2655	-3511.3440	-3511.3725	-3511.3158	-3511.1953	-3511.0441	-3510.8917	-3510.7616	-3510.6732	-3510.6413	-3510.6732	-3510.7616	-3510.8917	-3511.0441	-3511.1953	-3511.3158	-3511.3725	-3511.3440	-3511.2655	-3511.1869
# Energies for vdWDF2 method
-3099.1272	-3099.2444	-3099.3526	-3099.3946	-3099.3453	-3099.2313	-3099.0838	-3098.9324	-3098.8027	-3098.7147	-3098.6835	-3098.7147	-3098.8027	-3098.9324	-3099.0838	-3099.2313	-3099.3453	-3099.3946	-3099.3526	-3099.2444	-3099.1272
# Energies for B3LYP-XDM method
-2.4262	-2.4942	-2.5227	-2.5071	-2.4455	-2.3405	-2.2029	-2.0608	-1.9338	-1.8448	-1.8132	-1.8448	-1.9338	-2.0608	-2.2029	-2.3405	-2.4455	-2.5071	-2.5227	-2.4942	-2.4262
